# Supplementary material
Source: Springer Nature journal article supplement (https://www.springermedizin.de/resource/supplementary/13058_2010_2740_MOESM9_ESM.pdf/9702050)

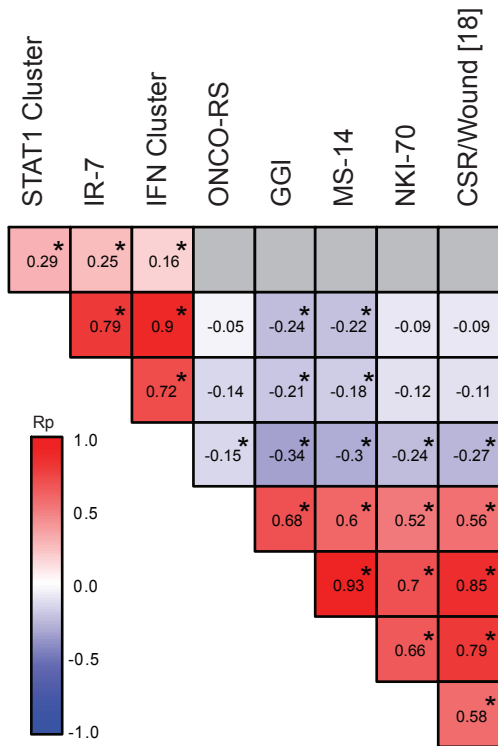

Training Dataset (n = 199)

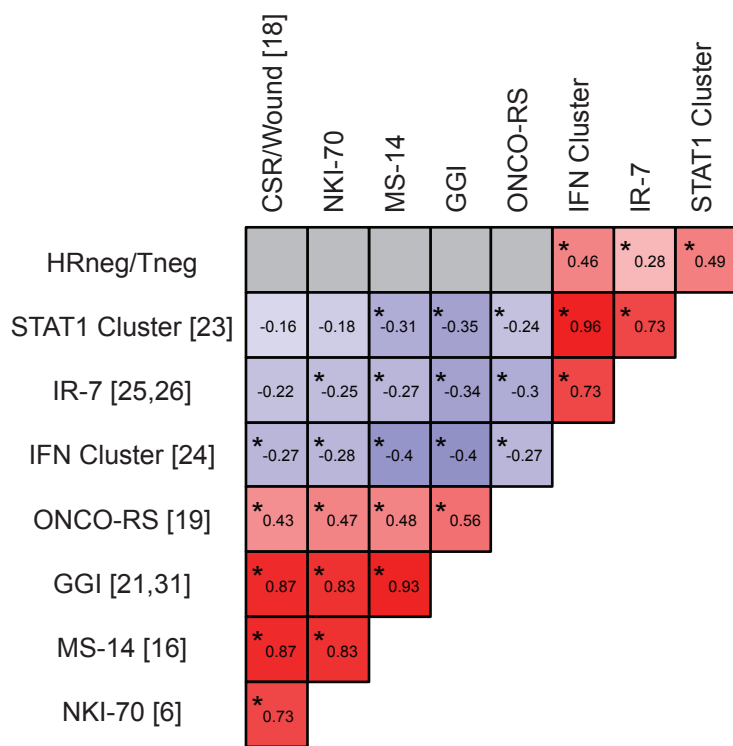

Validation Dataset (n = 75)

Supplement: MOESM9 [file 9702050]
